# Supplementary material for: Valganciclovir as Add-On Therapy Modifies the Frequency of NK and NKT Cell Subpopulations in Disseminated Kaposi Sarcoma Patients
Source: MDPI journal article supplement (doi:10.3390/cancers14020412), 2022-01-14
Supplement: s1 [file s1]

## Article

# Valganciclovir as Add-On Therapy Modifies the Frequency of NK and NKT Cell Subpopulations in Disseminated Kaposi Sarcoma Patients

Julio Flores-Gonzalez <sup>1,†</sup>, Lucero A. Ramon-Luing <sup>1,†</sup>, Ranferi Ocaña-Guzman <sup>1</sup>, Ivette Buendia-Roldan <sup>2</sup>, Beda Islas-Muñoz <sup>3</sup>, Patricia Volkow-Fernández <sup>3</sup> and Leslie Chavez-Galan <sup>1,\*</sup>

<sup>1</sup> Laboratory of Integrative Immunology, Instituto Nacional de Enfermedades Respiratorias Ismael Cosío Villegas, Mexico City 14080, Mexico; jfloresg1707@alumno.ipn.mx (J.F.-G.); ramonluing@yahoo.com.mx (L.A.R.-L.); arocana@iner.gob.mx (R.O.-G.)

<sup>2</sup> Laboratory of Translational Research in Aging and Pulmonary Fibrosis, Instituto Nacional de Enfermedades Respiratorias Ismael Cosío Villegas, Mexico City 14080, Mexico; ivettebu@yahoo.com.mx

<sup>3</sup> Infectious Diseases Department, Instituto Nacional de Cancerología, Mexico City 14080, Mexico; bedaislas@gmail.com (B.I.-M.); pvolkowf@gmail.com (P.V.-F.)

\* Correspondence: lchavez\_galan@iner.gob.mx or lchavezgalan@gmail.com; Tel. +52-555-487-1700 (ext. 5270)

† These authors contributed equally to this work.

## Supplementary Material

**Table S1.** Antibodies used for flow cytometry and ELISA.

| Antibody   | Conjugate to | Clone/Catalog <sup>1</sup> | Company       |
|------------|--------------|----------------------------|---------------|
| CD3        | APC-Cy7      | OKT3                       | Biologend     |
| CD56       | PE           | B159                       | BD Pharmingen |
| CD16       | PE           | 3G8                        | BD Pharmingen |
| CD57       | Pe-Cy7       | HNK-1                      | BD Pharmingen |
| CD27       | PerCP-Cy5.5  | O323                       | BD Pharmingen |
| KLRG1      | FITC         | 2FI/KLRG1                  | Biologend     |
| CD279      | APC          | EH12.2H7                   | Biologend     |
| CD25       | BV421        | BC96                       | Biologend     |
| Viability  | PE TexRed    | NA†                        | Biologend     |
| IL-15      | NA†          | 435104                     | Biologend     |
| sPD-L1     | NA†          | DY156                      | R&D System    |
| sPD-L2     | NA†          | DY1224                     | R&D System    |
| E-cadherin | NA†          | DY648                      | R&D System    |

<sup>1</sup> The clone is indicated for flow cytometry antibodies and the catalog number for ELISA. NA, not applicable.

**Table S2.** IL-15 levels in KS/HIV patients across follow-up.

|    | IL-15 (pg/mL)        |                    |                      |
|----|----------------------|--------------------|----------------------|
|    | W <sub>0</sub>       | W <sub>4</sub>     | W <sub>12</sub>      |
| CT | 18.60<br>(13.8-19.7) | 8.6<br>(7.8-22.8)  | 12.8<br>(7.8-15.9)   |
| MT | 18.3<br>(11.7-26.0)  | 11.2<br>(7.8-15.8) | 10.06<br>(7.8-11.21) |

Data are represented as median with interquartile range. CT=conventional treatment (ART), MT= modified treatment (VGC+ART).

**Table S3.** Frequency of NK cells subsets in control groups included in this study.

| Subsets | HIV-Negative Men    | HIV+ Asymptomatic Men | <i>p</i> |
|---------|---------------------|-----------------------|----------|
| NK dim  | 88.9 (86.8 to 90.0) | 70.3 (51.5 to 84.0)   | ns       |
| CD57+   | 24.3 (19.3 to 33.3) | 45.9 (22.7 to 52.0)   | ns       |
| CD27+   | 4.7 (3.8 to 5.1)    | 1.7 (1.4 to 2.3)      | 0.0007   |
| NK high | 11.1 (9.9 to 13.2)  | 29.7 (15.9 to 48.5)   | ns       |
| CD57+   | 37.6 (22.1 to 44.8) | 54.3 (17.4 to 59.7)   | ns       |
| CD27+   | 4.9 (4.6 to 8.2)    | 1.9 (1.5 to 4.8)      | 0.0047   |

Data are represented as median with interquartile range. Statistical comparisons were performed using Mann–Whitney U test, CI 95%. (ns: not-significant). HIV, Human immunodeficiency virus 1.

**Table S4.** Frequencies of CD57+ and CD27+ on NK cells subpopulations across follow-up in KS/HIV patients.

|       |    | NK <sup>dim</sup> Cells |                     |                 | NK <sup>high</sup> Cells |                     |                     |
|-------|----|-------------------------|---------------------|-----------------|--------------------------|---------------------|---------------------|
|       |    | W <sub>0</sub>          | W <sub>4</sub>      | W <sub>12</sub> | W <sub>0</sub>           | W <sub>4</sub>      | W <sub>12</sub>     |
| CD57+ | CT | 10.7<br>(5.2-14.1)      |                     |                 | 15.2<br>(6.6-26.4)       |                     |                     |
|       | MT | 8.0<br>(4.7-16.9)       |                     |                 | 10.8<br>(7.4-37.0)       |                     |                     |
| CD27+ | CT | 8.8<br>(4.8-11.5)       |                     |                 | 11.5<br>(8.6-13.3)       |                     | 18.7<br>(17.1-25.0) |
|       | MT | 5.1<br>(3.4-7.7)        | 17.0<br>(14.9-21.6) |                 | 6.5<br>(4.6-14.5)        | 29.2<br>(20.8-31.5) | 27.0<br>(22.6-32.2) |

Data are represented as median with interquartile range of the percentage. CT=conventional treatment (ART), MT= modified treatment (VGC+ART).

**Table S5.** PD-1 on the surface of circulating NK cells subsets.

|       |    | NK <sup>dim</sup> Cells |                        |                        | NK <sup>high</sup> Cells |                        |                        |
|-------|----|-------------------------|------------------------|------------------------|--------------------------|------------------------|------------------------|
|       |    | W <sub>0</sub>          | W <sub>4</sub>         | W <sub>12</sub>        | W <sub>0</sub>           | W <sub>4</sub>         | W <sub>12</sub>        |
| CD57+ | CT | 92.0<br>(29.0-109.2)    | 126.4<br>(49.0-161.0)  | 63.0<br>(57.5-116.4)   | 56.0<br>(42.0-100.0)     | 72.1<br>(44.3-153.2)   | 101.3<br>(89.0-119.0)  |
|       | MT | 69.0<br>(44.5-76.1)     | 174.5<br>(94.9-246.5)  | 12.3<br>(6.7-119.8)    | 66.0<br>(46.2-82.0)      | 46.0<br>(34.1-64.0)    | 48.1<br>(18.0-75.0)    |
| CD27+ | CT | 160.2<br>(142.0-277.8)  | 240.0<br>(112.1-291.4) | 72.4<br>(41.8-84.2)    | 584.5<br>(469.8-615.3)   | 261.5<br>(147.3-409.3) | 163.5<br>(127.8-227.0) |
|       | MT | 238.0<br>(190.0-341.4)  | 210.3<br>(128.0-265.5) | 203.0<br>(158.8-232.5) | 591.0<br>(273.0-857.0)   | 558.5<br>(434.8-774.0) | 458.5<br>(344.3-513.0) |

Data are represented as median with interquartile range of the MFI. CT=conventional treatment (ART), MT= modified treatment (VGC+ART).

**Table S6.** KLRG1 on the surface of circulating NK cells subsets.

|                   |    | NK <sup>dim</sup> Cells |                      |                     | NK <sup>high</sup> Cells |                     |                     |
|-------------------|----|-------------------------|----------------------|---------------------|--------------------------|---------------------|---------------------|
|                   |    | W <sub>0</sub>          | W <sub>4</sub>       | W <sub>12</sub>     | W <sub>0</sub>           | W <sub>4</sub>      | W <sub>12</sub>     |
| CD57 <sup>+</sup> | CT | 43.2<br>(31.0-60.0)     | 56.0<br>(43.0-95.0)  | 58.0<br>(38.3-74.5) | 25.0<br>(11.0-40.4)      | 54.3<br>(43.6-68.1) | 69.4<br>(64.8-74.5) |
|                   | MT | 48.8<br>(41.7-59.5)     | 55.0<br>(49.0-66.0)  | 61.3<br>(59.4-79.4) | 5.6<br>(2.9-8.4)         | 38.8<br>(19.3-57.1) | 67.0<br>(57.5-72.8) |
| CD27 <sup>+</sup> | CT | 45.8<br>(29.5-59.1)     | 73.2<br>(52.6-147.3) | 65.0<br>(57.0-86.0) | 22.8<br>(17.9-37.5)      | 67.5<br>(53.9-76.9) | 58.2<br>(49.1-73.8) |
|                   | MT | 37.9<br>(30.9-47.1)     | 63.9<br>(49.8-80.7)  | 79.6<br>(53.6-93.6) | 26.0<br>(19.8-31.6)      | 58.4<br>(41.4-80.0) | 66.4<br>(55.0-68.7) |

Data are represented as median with interquartile range of the MFI. CT=conventional treatment (ART), MT= modified treatment (VGC+ART).

**Table S7.** Frequency of NKT cells subsets in control groups included in this study.

| Subsets           | HIV-Negative Men    | HIV+ Asymptomatic Men | <i>p</i> |
|-------------------|---------------------|-----------------------|----------|
| NKT dim           | 67.2 (51.5 to 85.5) | 85.9 (80.6 to 91.9)   | ns       |
| CD57 <sup>+</sup> | 44.0 (32.9 to 47.8) | 48.5 (25.0 to 53.1)   | ns       |
| CD27 <sup>+</sup> | 8.22 (6.6 to 23.5)  | 14.2 (5.3 to 25.8)    | ns       |
| NKT high          | 34.9 (14.4 to 48.4) | 14.1 (8.0 to 19.4)    | ns       |
| CD57 <sup>+</sup> | 44.8 (24.4 to 48.0) | 57.2 (43.4 to 74.3)   | ns       |
| CD27 <sup>+</sup> | 9.1 (6.6 to 11.3)   | 6.8 (4.9 to 13.0)     | ns       |

Data are represented as median with interquartile range. Statistical comparisons were performed using Mann–Whitney U test, CI 95%. (ns: not-significant). HIV, Human immunodeficiency virus 1.

**Table S8.** Frequencies of CD57<sup>+</sup> and CD27<sup>+</sup> on NKT cells subpopulations across follow-up in KS/HIV patients.

|                   |    | NKT <sup>dim</sup> Cells |                     |                    | NKT <sup>high</sup> Cells |                     |                     |
|-------------------|----|--------------------------|---------------------|--------------------|---------------------------|---------------------|---------------------|
|                   |    | W <sub>0</sub>           | W <sub>4</sub>      | W <sub>12</sub>    | W <sub>0</sub>            | W <sub>4</sub>      | W <sub>12</sub>     |
| CD57 <sup>+</sup> | CT |                          |                     |                    | 27.7<br>(13.8-42.4)       |                     |                     |
|                   | MT |                          |                     |                    | 50.0<br>(44.9-68.7)       | 20.6<br>(10.2-34.6) | 24.2<br>(16.9-35.9) |
| CD27 <sup>+</sup> | CT | 12.9<br>(7.5-22.1)       | 28.9<br>(20.0-41.5) |                    | 17.7<br>(14.2-24.8)       |                     |                     |
|                   | MT | 6.7<br>(4.2-15.5)        | 19.7<br>(10.7-24.5) | 18.7<br>(9.9-32.1) | 13.1<br>(11.4-16.8)       | 33.3<br>(22.8-37.2) | 25.5<br>(21.3-34.7) |

Data are represented as median with interquartile range of the percentage. CT=conventional treatment (ART), MT= modified treatment (VGC+ART).

**Table S9.** PD-1 on the surface of circulating NKT cells subsets.

|                   |    | NKT <sup>dim</sup> Cells |                        |                        | NKT <sup>high</sup> Cells |                        |                        |
|-------------------|----|--------------------------|------------------------|------------------------|---------------------------|------------------------|------------------------|
|                   |    | W <sub>0</sub>           | W <sub>4</sub>         | W <sub>12</sub>        | W <sub>0</sub>            | W <sub>4</sub>         | W <sub>12</sub>        |
| CD57 <sup>+</sup> | CT | 57.1<br>(29.0-120.0)     | 40.0<br>(33.0-89.0)    | 71.4<br>(39.0-99.0)    | 172.0<br>(118.5-259.5)    | 364.0<br>(250.5-402.0) | 179.2<br>(162.5-277.1) |
|                   | MT | 69.0<br>(50.0-96.0)      | 51.4<br>(34.3-116.0)   | 89.0<br>(48.0-160.0)   | 183.3<br>(106.2-292.0)    | 200.0<br>(129.2-262.5) | 221.0<br>(123.0-279.2) |
| CD27 <sup>+</sup> | CT | 237.0<br>(178.5-338.3)   | 372.1<br>(300.0-428.5) | 70.1<br>(55.5-90.9)    | 359.4<br>(271.0-490.0)    | 624.6<br>(211.3-924.0) | 188.5<br>(82.9-324.3)  |
|                   | MT | 123.2<br>(104.5-337.5)   | 246.4<br>(171.4-396.4) | 204.0<br>(123.2-241.1) | 255.2<br>(203.1-755.2)    | 613.3<br>(558.8-759.0) | 343.5<br>(166.3-64.5)  |

Data are represented as median with interquartile range. CT=conventional treatment (ART), MT= modified treatment (VGC+ART).

**Table S10.** KLRG1 on the surface of circulating NKT cells subsets.

|                   |    | NKT <sup>dim</sup> Cells |                     |                     | NKT <sup>high</sup> Cells |                      |                        |
|-------------------|----|--------------------------|---------------------|---------------------|---------------------------|----------------------|------------------------|
|                   |    | W <sub>0</sub>           | W <sub>4</sub>      | W <sub>12</sub>     | W <sub>0</sub>            | W <sub>4</sub>       | W <sub>12</sub>        |
| CD57 <sup>+</sup> | CT | 62.5<br>(49.0-71.0)      | 71.5<br>(60.0-88.0) | 69.4<br>(60.4-79.5) | 40.4<br>(23.4-50.7)       | 52.0<br>(41.0-95.0)  | 64.6<br>(48.8-71.3)    |
|                   | MT | 65.2<br>(50.0-74.0)      | 74.3<br>(64.0-87.0) | 64.0<br>(55.2-75.0) | 61.0<br>(22.0-125.0)      | 56.0<br>(13.0-82.0)  | 68.0<br>(55.0-83.3)    |
| CD27 <sup>+</sup> | CT | 52.0<br>(42.3-67.4)      | 58.3<br>(47.0-94.4) | 71.0<br>(61.1-96.2) | 36.8<br>(31.0-53.4)       | 86.1<br>(54.1-114.2) | 188.5<br>(82.9-324.3)  |
|                   | MT | 53.2<br>(45.2-63.8)      | 68.1<br>(54.1-85.0) | 75.8<br>(60.9-83.5) | 51.0<br>(34.7-57.0)       | 73.2 (64.1-88.2)     | 343.5<br>(166.3-464.5) |

Data are represented as median with interquartile range. CT=conventional treatment (ART), MT= modified treatment (VGC+ART).

**Table S11.** Plasma levels of PD-L1, PD-L2, E-cadherin, and IL-15.

|                    | HIV-Negative Men       | HIV+ Asymptomatic Men     | KS/HIV                     |          |                            |          |
|--------------------|------------------------|---------------------------|----------------------------|----------|----------------------------|----------|
| Molecule/treatment |                        |                           | CT                         | <i>p</i> | MT                         | <i>p</i> |
| IL-15              | 9.04<br>(7.8-9.8)      | 10.2<br>(8.1-11.6)        | 18.60<br>(13.8-19.7)       | 0.0005   | 18.3<br>(11.7-26.0)        | 0.0004   |
| PD-L1              | 75.2<br>(48.5-135.5)   | 116.8<br>(73.1-459.0)     | 157.3<br>(138.0-468.0)     | 0.0173   | 156.0<br>(156.0-244.0)     | 0.0215   |
| PD-L2              | 3112.0<br>(2159-4412)  | 7761.0<br>(4567.0-9183.0) | 8961.0<br>(6784.0-10577.0) | 0.0006   | 8081.0<br>(6397.0-10536.0) | 0.0018   |
| E-cadherin         | 302.6<br>(230.6-420.6) | 448.0<br>(273.0-612.2)    | 990.0<br>(763.3-395.0)     | 0.0019   | 1030.0<br>(559.2-1857.0)   | 0.0023   |

Data are represented as median with interquartile range in pg/mL. Statistical comparisons were performed using the Kruskal-Wallis test, and the *p*-value represents the comparison between HIV-negative men and KS/HIV groups. HIV, Human immunodeficiency virus 1; CT=conventional treatment (ART), MT= modified treatment (VGC+ART).
